# Supplementary material for: The liver and muscle secreted Hfe2-protein maintains blood brain barrier integrity
Source: Research Square preprint supplement (doi:10.21203/rs.3.rs-1028867/v1), 2021-12-02
Supplement: Supplementary file 1 [file 310f9ef0310f058d364283af.docx]

**METHODS**

**Animals:** All animal handling was approved according to the Animal Resource & Care Committee at University Health Network. Liver-specific Hfe2 congenital knockout, homozygous Hfe2ΔAlb-Cre transgenic mice (Mutant Mouse Resource & Research Center, University of California, Davis, MMUCD strain 036464-UCD) were maintained on C67Bl/129S1 mixed background and 6-8 weeks mice were selected for experiment. Hfe2fl/fl littermates were used as controls. Deletion of liver Hfe2 production in adult mice was achieved by injecting 6-8 weeks of Hfe2fl/fl were with an average dose of 5x1011 genome copies of either AAV8-AlbCre (VB1570) or AAV8-GFP (VB1743) viruses (Vector Biosystems Inc). FC/IO #:410010959. Neofl/fl, was kindly provided by Dr. Jean-Francois Cloutier. They were maintained on C57BL/6J background. Endothelial specific inducible knock-out mice, NeoΔTie2-creERT2, were generated by crossing Neofl/fl with Tie2 Cre-ERT2 mice (Jackson Laboratories). Conditional knock-out mice, NeoΔTie2-creERT2 TAM+, were given 75 mg/kg of tamoxifen between 6-8 weeks of age over 5 consecutive days via IP injection (20 mg/mL corn oil solution). Control mice, NeoΔTie2-creERT2 TAM-, were given an equivalent amount of corn oil vehicle (typically 100 µL). Experiments were carried out 3-4 weeks after the last Tamoxifen (or vehicle) injection. Muscle-specific Hfe2 congenital knockout, homozygous Hfe2ΔActa-Cre transgenic mice were maintained on a C67B1/129S1 mixed background (The Jackson Laboratory, ACTA1-cre, FBV.Cg-Tg(ACTA1-cre)79Jme/J, 006139). Wild type mice were purchased from The Jackson Laboratory (000664) and mice between 6-8 weeks of age were selected for experiment. Mice were maintained on C57BL/6J background.

The following table list the primers used for genotyping of animals with RTq-PCR, see below.

| Primer specificity | Forward (5’ to 3’) | Reverse (5’ to 3’) |
| --- | --- | --- |
| Hfe2 (LoxP) | GAATGGCTTCCTTCCATCAA | ATCTTCAAAGGCTGCAGGAA |
| Albumin-Cre | TGCAAACATCACATGCACAC | TTGGCCCCTTACCATAACTG |
| ACTA1-Cre | GCGGTCTGGCAGTAAAAACTATC | GTGAAACAGCATTGCTGTCACTT |
| Neogenin | TGGGTAGCTCGATCCTCAGT | TATGTGCTCGCCAAAAACAA |
| Tie2-Cre (LoxP) | CGCATAACCAGTGAAACAGCATTGC | CCCTGTGCTCAGACAGAAATGAGA |

***Ex-vivo* light-sheet imaging & image analysis**: Mice were injected with Lysine-fixable Texas Red-conjugated 70 kDa dextran (TR-dextran) (D1864, Thermo Fisher) via tail vein and left undisturbed for one hour to allow enough TR-dextran circulation duration. Mice were subsequently anesthetized with isoflurane and transcardially perfused with 15 mL of phosphate buffer saline (PBS) followed by 5 mL of 4% paraformaldehyde (PFA). Brains were collected and submerged in 4% PFA overnight. Brain tissues were lipid-cleared using advanced CUBIC protocols [1](#_ENREF_1). Samples were incubated in 50ml of CUBIC-1 solution containing a mixture of urea (25 wt%, Bioshop, URE001.500), Quadrol (25 wt%, Sigma, 22262-1L), Triton X-100 (15 wt%, Bioshop, TRX777.500) and ddH2O (10 wt%) at 37 °C for 7 days. CUBIC solution was replaced daily. Samples were stored in CUBIC reagent at room temperature upon complete optical transparency of the tissue. Optical-transparent samples were imaged on a commercially available light-sheet fluorescence microscope (LSFM) (UltramicroscopeII, LaVision BioTec) equipped with an optimized Zoom Body (MVX-10, Olympus, Japan), a sCMOS camera (Andor Neo5.5) and a 2× objective lens with a 6 mm working distance dipping cap (Olympus). Images were taken at 590 nm excitation wavelength at 30% laser power with 2.5× zoom. Light-sheet microscopy images were acquired at 2.2 Hz using 250 ms exposure with each frame offset by 10 µm steps across the half-brain volume. Light-sheet images were gamma corrected for display purposes. Maximum intensity projections of stack images were performed using ImageJ (NIH, <https://imagej.nih.gov/ij/>). The 3D reconstructions and manipulations were done using the Imaris9.0 surface module (Bitplane, <http://www.bitplane.com/imaris>). Analysis was done by normalizing total fluorescence intensity to the total brain volume.

***In-vivo* multiphoton imaging & image analysis**: Mice were first anesthetized by intra-peritoneal injection of avertin at a dose of 250 mg/kg. For local analgesia 100 µL of bupivacaine (2.5 mg/ml) was injected into the scalp. A craniotomy was performed with dental drill to create an optical window over the parietal cortex. Cranial window was made with 0.5% agarose covered with 8 mm diameter round cover slip. Mice were subsequently received 150 µg of TR-dextran (D1864, Thermo Fisher) at a concentration of 10 mg/mL via tail vein. Cerebral vessel was imaged using a Leica two-photon microscope equipped with 25× objective water immersion lenses. Texas Red fluorophore was excited at 1100 nm with 5% laser power and emission was detected with 600-800 nm filters. The field of view (348 µm x 348 µm) was chosen pseudo-randomly such that several vessel types were observed. A vertical range of approximately 200 µm, which included the cortical surface near the top, was selected for axial scanning in 10 µm steps. We chose a scan speed of 700 [a.u.], which corresponded to a 1.5 Hz frame rate or approximately two full volume scans per minute. Detector gain was adjusted automatically to avoid saturated pixels. Time-lapse images were continuously taken for 5 to 45 minutes. All statistical analysis was done using ImageJ. The acquired z-stacks at each time-point were projected to a single image based on the maximum sample value. In separate controls, the dura was imaged with second-harmonic generation imaging of collagen, which is absent inside the brain and precisely defines the boundary between the central nervous system and the rest of the body.  Diffuse dye leakage observed above the most superficial blood vessels was discarded before applying the maximum value projection. These single projected images were normalized to the 5 min time-point using standard ΔF/F normalization method with prior subtraction of tissue background at each time-point. Arterioles and venules were excluded from the mean fluorescence intensity computations for each time-point. When local leaks were observed superficial to an excluded vessel, typically overlapping the vessel edge, the region of vessel exclusion was adjusted frame-wise to include this leakage signal. This analysis was facilitated by a simple semi-automated vessel segmentation plugin we internally developed for ImageJ. Pooled normalized time series were compared among different groups at each time points. To assess overall differences between groups we compensated for the initial leakage before the 5 min time-point using a more absolute measure of leakage: the fraction of tissue region pixels above the mode vessel region intensity. Groups were pairwise contrasted using repeated measures ANOVA applied to the pool pixel leakage fraction after log-rescaling to correct for positive skew. Graphically, these were represented as the time averaged mean and sem.

**Immunohistochemistry:** Animals were perfused with 20 mL of PBS, followed by 10 ml of 4% PFA. Animal tissues were collected and incubated in 4% PFA overnight in 4 ºC. After overnight fixation, tissues were washed 3× with PBS and left to sink in the 30% sucrose / PBS solution in 4 ºC for five days. Tissues were then embedded into the 30% sucrose / Optical Cutting Temperature (OCT) compound (Tissue-Tek, VWR) in a 1:1 ratio and placed on dry ice until frozen. The frozen OCT-embedded brains were stored at -80 ºC and 12-14 µm cryosections were mounted on slides. The slides were then stored in -80 ºC and prior to staining were prewarmed at room temperature for 20 minutes. The slides were re-hydrated with PBS for 5 minutes, before a 5 min permeabilization step in 0.1% Triton X-100 in PBS (PBST). Sections were then blocked with 5% bovine serum albumin (BSA) in PBS for one hour. After blocking, slides were incubated with the primary antibody diluted in 1% BSA in PBST overnight at 4 ºC (antibody list below). The slides were then washed in PBST before incubation with the species-appropriate secondary antibody at a dilution of 1:1000 in PBS +10% FBS + 0.3% triton for 1 hour at room temperature. The slides are washed twice with 0.3% PBST, with a 5 min DAPI stain in between. Following the final wash, coverslips were mounted using DAKO mounting medium (Agilent). Slides were then stored in the dark at 4 ºC until imaging. All antibodies are listed in supplementary Table 1. Cell counting of NeuN stained cryosections were manually done with the ImageJ.

**Immunostaining of MS autopsy sections**

Immunostaining of brains of MS patients was performed as previously described [2](#_ENREF_2). In brief, 4-6 µm sections of human brain were fixed in acetone with 0.3% H2O2 for 10 mins at room temperature. The sections were blocked with 2.5% horse serum for 10 min and incubated with primary antibody anti-RGMa antibody (R&D Systems, Minneapolis, MN) overnight at 4 ºC. The following day, sections was incubated with secondary antibody followed by streptavidin and peroxidase complex (Vector labs). Sections were counterstained with hematoxylin (Sigma) and mounted with coverslip. All antibodies are listed in Supplementary Table 1.

**Confocal imaging & image analysis**: Stained and mounted tissue sections were imaged using Zeiss confocal laser scanning microscope 780 equipped with 40× water immersion objective. Specific fluorophore was excited at either 405, 488, 561 or 633 nm excitation wavelength. Pinhole was consistently set at 1.00 Airy units. The z-stack images were captured with 8-10% laser power and digital gain of 600-700 [a.u.]. Quantitative analysis for fibrinogen deposition was done by measuring fibrinogen fluorescence intensity in the perivascular space (outside isolectin staining of vasculature) [3](#_ENREF_3). Imaging was performed on images taken at the same intensity.

Immune cell infiltration was measured by normalizing total fluorescence intensity of immune cells to the total tissue area. For confocal TR-dextran imaging, 50 μm coronal brain sections from vibratome were incubated in blocking/permeabilization solution (1% bovine serum albumin, 0.5% TritonX-100 in PBS) overnight at 4 °C, followed by incubation in conjugated antibody solution overnight at 4 °C. Sections were mounted in Prolong Diamond antifade reagent. All analysis was done using ImageJ.

**ELISA:** Mice blood sample was collected by cardiac puncture. Collected blood was left to clot in room temperature for 1 hour and centrifuged at 8000 rpm for 30 mins. Top layer serum was collected and stored in -20 ºC.Mouse RGMa and Hfe2 ELISA assay was done using Quantikine® ELISA kit (R&D, MRGMAO and MRGMCO, respectively). All serum concentration was measured using PierceTM BCA Protein Assay Kit. The optical density of ELISA plate was read using microplate reader (BioTek EL311 AutoReader) at 450 nm wavelength. Results were calculated based on standard curve.

**DNA transfection & soluble ligand purification**: Soluble Hfe2, RGMa and 4IG was genetically tagged with six histidine residues at both N- and C-terminal and cloned into pSecTag2B expression vector (Invitrogen). DNA transfection and protein production protocol were inspired and modified from Aricescu et al[4](#_ENREF_4). Upon 90% confluency, human embryonic kidney (HEK) cells were transfected with 60 µg of DNA / polyethylenimine (PEI) complexes (Sigma-Aldrich). Culturing media was changed from GibcoTM DMEM (Thermo Fisher) with 5% GibcoTM Fetal Bovine Serum (Thermo Fisher) and 1% GibcoTM Penicilin-Streptomycin (Thermo Fisher) to GibcoTM DMEM (Thermo Fisher) with 2% GibcoTM Fetal Bovine Serum after 6 hours following PBS wash. Transfected HEK cells were placed in the humidified incubator at 37ºC and 5% CO2 environment for 3 days. On day 3, media was collected and centrifuged (1100 rpm for 5 min). To 50 mL of supernatant we added 1 mL of Ni-NTA Agarose Nickel-charged Resin (QIAGEN) for his-tag mediated protein binding. The mixture was incubated on a rocking bed with 50 rotations per minutes in 4ºC for 2 hours. After incubation, the solution mixture was poured into an empty Econo-Pac® Chromatography Column (Bio-Rad) to isolate the beads using gravity flow. The beads were washed three times with 50 mL of 5 mM imidazole (Sigma, I5513) + 500mM NaCl in 1xPBS. The proteins were eluted with 300 µL of 300 mM imidazole+500nM NaCl in 1xPBS. The elutes were placed in 12-14 kDa FisherbrandTM Regenerated Cellulose Dialysis Tubing (Thermo Fisher) overnight in 4 ºC in 1xPBS (replaced with fresh for last 2-3 hours of incubation) to remove the imidazole in the solution.

Protein purity was assessed by running a 10% SDS gel followed by a 20-minute Coomassie Blue stain. This stain was then washed briefly in Coomassie de-staining solution. To confirm the 20 presence of our protein of interest, a western blot was run using a 10% SDS gel. Prior to loading, 6X SDS loading dye was added to the protein sample and was heated at 95-100 ºC for 3-5 minutes in order to denature the protein. A Tris-glycine running buffer (25mM Tris, 192mM Glycine, 1% SDS) was used and the gel was run at 200V for 40 minutes. After completion, the gel was transferred to a nitrocellulose membrane (Bio-Rad) at 80 V for 1 hour at 4ºC. Following the transfer, the nitrocellulose membrane was blocked using a blocking solution consisting of 5% milk (powder) dissolved in PBS. The membranes were then incubated O/N at 4ºC in a PBST solution (5% blocking buffer with 0.1% tween in PBS) with the primary antibody (mouse monoclonal anti-His; abcam – G020). Membranes were then washed three times using PBST 0.1%, followed by a 1-2 hours incubation with the secondary antibody (list below) in PBST. Proteins were then visualized using the Odyssey infrared Imaging system.

Protein solution was concentrated using 10 kDa Amicon® Ultra-0.5 Centrifugal Filters (Sigma). The concentration of final protein product was measured following a 30-minute incubation at 37 ºC through optical absorption (spectrophotometer) at 560 nm using PierceTM BCA Protein Assay Kit (Thermo Fisher) and aliquoted in the concentration of 1 µg/µL. Protein aliquots were stored in -20ºC.

**Competitive binding assay:** A 96-well microtiter plate (Corning) was coated with 100 μL (10 μg/mL) of Poly-L-Lysine (Sigma, P8920) at 4 °C overnight. Wells were then washed with 100 μL of PBST (+0.02% Tween-20). 50μl (2.5 μg/mL) of purified ligands (Hfe2 and RGMa) were then coated onto each well for 1 hr at 37°C. Each well was then blocked with 300 μL of 3% BSA in PBST for 1 hr at 37 °C. Following blocking, 50 μL (1.0 μg/mL) Alkaline Phosphatase (AP)-tagged Neogenin with various ligand combination in 1% BSA + PBST were added to each well and incubated at 37 °C for 1 hr. Each well was washed thoroughly with 100 μL PBST and equilibrated using AP developing buffer (100 mM NaHC03, 1 mM MgCl2). The reaction was developed using AP developing buffer supplemented with, p-nitrophenyl phosphate (pNPP, Sigma-Aldrich). The reaction was terminated with 50 μL (0.1 M) NaOH. The absorbance of each reaction was measured using a microplate autoreader (BioTek EL311 AutoReader) at 405 nm wavelength.

**Transwell brain endothelial monolayer permeability assay:** The endothelial monolayer permeability assay was performed as previously described DiStefano et al[5](#_ENREF_5). Murine Brain Endothelial cells (bEnd3) (ATCC®CRL-2299TM) were seeded on 3 µm pore Transwell inserts (Corning Life Sciences) coated with 10 µg/ml human plasma fibronectin (Sigma, FC010). The cells were grown on the inserts for two days until confluence. The cells were incubated in media containing 0.1% FBS and treated overnight with 5 µg/mL purified RGMa with or without 10 µg/mL Hfe2. TNFα (10 ng/ml) was added as a positive control. After treatments, horseradish peroxidase (HRP, Sigma, P8375) was added into the upper chamber at a concentration of 1.5 µg/ml and tracer flux was allowed for 2 hours. The HRP accumulation in the bottom chamber was assessed using a TMB colorimetric assay (Cell Signaling). 10 µL aliquots of media from the lower chamber were placed in a 96-well plate in triplicate and 100 µL of TMB was added. The reaction was allowed to proceed for one minute alongside a standard curve of HRP to empirically determine tracer concentration in the lower chamber. Then 100 µL of 1N HCL was added to terminate the reaction and absorbance was read at 450 nm. Raw absorbance values were converted to concentrations using the HRP standard curve.

**Trans-endothelial electrical resistance measurements (TEER):** bEnd3 cells were first thawed and plated onto Cellstar® 6cm tissue culture dish (Greiner Bio-One, 628160). Cells were cultured with 89% DMEM (Sigma, D5796-500ml), 10% FBS (Gibco, 12483-020) and 1% Pen Strep containing 100U/mL penicillin and 100 µg/mL of streptomycin (Gibco, 15140-122). bEnd3 were maintained in a humidified incubator at 37 °C and 5% CO2 environment. Upon confluency, bEnd3 were seeded into 24-well polyester membrane Transwell® inserts (0.4 µm pore diameter) (Corning, 3470) with a seeding density of 75,000 cells/inserts. TEER values were measured daily using Endohm-6 voltohmmeter chamber (World Precision Instruments) and resistance measurement reading was computed by EVOM2 (World Precision Instruments). Blank resistant value was subtracted from total resistance and further multiplied by the total surface area of the insert to obtain final TEER values (Ωcm2). Ligand treatments were administered at 1µg/insert into the culture media. TEER values were monitored in 5, 60, 120, and 180 min time intervals.

**Endothelial cell isolation & membrane extraction:** Endothelial extraction protocol was adopted from Wu et al.3. Ten mice brains were collected and homogenized together with Dounce tissue grinder in ice cold MCDB131 media (Dibco, 1935552). Homogenized tissue was resuspended in 15% 70 kDa dextran (Sigma, 44886) and centrifuge at 10,000 g for 30 mins. The pellet was digested in 1 mg/mL collagenase & dispase (Roche, Colldisp-ro) in 37 ºC for 2 hours. The digested product was resuspended in 45% Percoll and centrifuged at 20,000 g for 10 mins. Isolated endothelial cells at the top layer were collected and washed with ice cold PBS. Isolated cells were then place in membrane HB buffer (10 mM HEPES, 25 mM KCl, 5 mM MgCl2) and resuspended thoroughly. Sucrose gradient was created using 50% sucrose overly with 5% sucrose. Resuspended cells in HB buffer was added on top of 5% sucrose and centrifuged at 28,000 rpm for 10 mins. Membrane in the middle phase was removed and concentration was measured using a PierceTM BCA Protein Assay Kit. Equal amount of membrane was used for Western blot.

**Immunocytochemistry & cell lysate:** 24-wells round coverslip bottom were coated with 100 μl (10 μg/mL) of Poly-L-Lysine at 4°C overnight. bEND3 cells were seeded directly on top and maintained in a humidified incubator at 37 °C and 5% CO2 environment. Upon 90% confluency, bEnd3 was treated with various ligand combination overnight. For immunostaining, cells were fixed with 4% PFA and blocked with 5% BSA in PBS for one hour. Cells were then incubated in primary antibodies diluted in 1% BSA overnight at 4 ºC. The following day, cells were washed with PBS and incubated with species-appropriate secondary antibodies for one hour and covered with coverslip using Dako mounting medium. For western blotting, cells were washed with ice cold PBS and lysed in 1x RIPA buffer (Cell Signaling). The lysates were scraped into Eppendorf tubes and centrifuged at 17000 g for 10 mins. Protein concentration was measured using PierceTM BCA Protein Assay Kit. Equal amounts of cell lysate were mixed with 2x Laemelli buffer and boiled at 95 ºC for 10 mins. All antibodies are listed in supplementary table1.

**PDGF-B expression in vitro and in vivo:** Culture bEnd3 cells were treated with RGMa and Hfe2 along with VEGF. Cells were then stained with PDGF-B antibody after 24 hours. RT-qPCR was used to quantify PDGF-B gene expression level in RGMa and Hfe2 treated bEnd3 cells. Cells were harvested after 24 hours and expression was normalized to GAPDH housekeeping gene. In vivo, PDGF-B expression was assessed from isolated brain endothelial cells in wild type and Hfe2Δalb-cre mice. Endothelial cell isolation procedure described above.

**Endothelial cell extraction and FACS isolation:** Endothelial cell extraction protocol was adopted and modified from Chen et al. 2004 [6](#_ENREF_6). Mice were euthanized by cervical dislocation and brains were collected into the DMEM supplemented with 5% FBS. Brains were then minced into small pieces of ~1x1mm in size, homogenized by 10mL syringe and transferred to 15-mL falcon tube. Homogenized tissues were centrifuged at 300g at 4 °C for 5 minutes and pellets were resuspended in 15mL of collagenase/dispase solution (split into 3 tubes). Solution containing cell pellets were rotated for 30 minutes at 37 °C to be digested and pelleted again in another 300g at 4 °C centrifugation. Pellets were then triturated via pipetting in 1ml of 2% FBS in PBS containing 50ul of DNase per tube. To remove myelin and debris from the solution, 4ml of 22% Percoll per tube was added to tubes, and solution containing digested tissues were added on top of Percoll layer. After 10 minutes at 560g at 4 °C, pellets were collected and resuspended in HBSS/BSA/glucose buffer to be ready for immunostaining and flow cytometry fluorescence activated cell sorting (FACS).

Antibodies were added to resuspended cells (FACS sample – 400ul, each control – 100ul each) at the following concentrations: CD31 (PE, 1:50, 4μg /ml), CD41 (APC, 1:200, 1μg/ml), SYTOX blue dead cell stain (ThermoFisher S34857, 1:1000). Treated cells were incubated for 15 minutes on ice covered from light and washed with HBSS/BSA/glucose buffer, then sent to flow cytometry facility.

**Quantitative RT-qPCR:** Sorted endothelial cells (from FACS isolation) were lysed and RNA was extracted via RNeasy Plus Mini Kit (Qiagen). Extracted RNA was digested with RQ1 RNase-free DNase (Promega, Ref #M6101) to prevent DNA contamination. Digested RNA sample was reverse transcribed and Quantitative PCR was performed with SYBR green master mix using Luna® Universal One-Step RT-qPCR Kit (NEB, #E3005) with 200 nM of primers. The reaction mixture was loaded into the Mastercycler Eppendorf Realplex for running 40 cycles followed by a melting curve analysis to confirm the purity of the products. Gene expression was determined using the comparative CT method with mRNA levels normalized to control housekeeping gene, GAPDH.

**Retinal explants outgrowth assay and axonal staining.** Poly-L-Lysine (SIGMA; 10µg/ml) coated glass coverslips were treated with Laminin (Invitrogen; 10µg/ml) and RGMa (5µg/ml) and incubated for 3hrs at room temperature. Temporal retinal explants were cultured on protein-coated surfaces for 18h. Treatment was done adding purified Hfe2/RGMc protein at the indicated concentration right after seeding the explants on the RGMa/Laminin substrate. Explants were then fixed with 4% PFA and stained with Alexa488-phalloidin. Fiber length was quantified using Image Pro 5.0.

**Western blot:** Equal amount of proteins was loaded on 10% SDS-PAGE gel and separated by electrophoresis. The gel was transferred onto nitrocellulose membrane. Membrane was blocked with 5% BSA in PBS for one hour and incubated in primary antibodies diluted in 1% BSA overnight at 4 ºC. The following day, cells were washed with PBST (0.1% Tween) and incubated with species-appropriate secondary antibodies for one hour. Membrane was imaged using Odyssey® Classic Blot Imager (Li-COR). Relative abundance of the protein was normalized to the loading control using ImageJ. All antibodies are listed in supplementary Table1. Prior probing for Hfe2/RGMa in serum, albumin was removed using the Thermofisher albumin depletion kit following manufacturer instructions.

**Induction and scoring of Experimental Autoimmune Encephalomyelitis (EAE) mice:** Female mice were subcutaneously injected with an emulsion of 50 μg myelin oligodendrocyte glycoprotein (MOG) amino acids 35-55 (Sheldon Biotech, Montreal, QC) peptide in incomplete Freund’s adjuvant (Sigma) supplemented with 1mg of mycobacterium tuberculosis (CFA) (Difco). 400 ng of pertussis toxin (List Biologicals) was administered intraperitoneally on days 0 and 2 post-immunization. For ligand treatment, 40 μg of purified protein was administered intravenously once every three days for the duration of the experiments. Disease severity was assessed using standard body conditioning scores: 0, no paralysis; 1, loss of tail-tone reflex; 2, loss of righting reflex; 3, complete hind limb paralysis; 4, forelimb weakness; 5, moribund or dead. Intermediate scores (.5) were given for animals which did not meet the upper scale of paralysis. A mean cumulative score was obtained from two assessments per day at 12-hr intervals.

**Adoptive transfer EAE protocols:** Donor WT mice were immunized with MOG and CFA. Animals were sacrificed 10 days post-immunization. Splenocytes and lymphocytes were isolated and re-stimulated with 50 ug/ml of MOG peptide and 10 ng/ml recombinant mouse IL-23, 10 ng/ml recombinant mouse IL-1α, 25 ug/ml anti-IFNγ, and 10 ug/ml anti-IL-4 (Biolegend) for 72 hours. After culture, CD4 T cells were isolated using a Miltenyi CD4 T cell isolation kit, stained with CellVue Maroon (Affymetrix) and 4 to 5 million cells were injected into the recipient wild type mice. Recipient mice were injected with pertussis toxin on days 0 and 2 and treated with 40 μg of Hfe2 once every three days. Spinal cords were collected and examined for cellular infiltrates on day 8 post-injection. The inflammatory index was based on the inflammatory index of H&E staining. Briefly, 0 = no cells. 1 and 2 had infiltration in the parenchyma of the spinal cord with 1 = 1-10 cells and 2 = 10 or more cells. 3 and 4 had infiltration within the white matter and grey matter with 3 = 1-10 cells and 4= 10 or more cells. 4 sections from each animal were scored and an average calculated per animal.

**Flow Cytometry and Intracellular Cytokine Staining**

Mice were euthanized at day 10 post-induction of EAE. Freshly isolated spleens and draining caudal lymph nodes (LN) were pressed using a syringe plunger through a 70μm cell strainers and washed twice using 2mL of 2% FBS in complete RPMI-1640 medium (Invitrogen) supplemented with 2-β Mercaptoethanol, L-glutamine, p/s, and non-essential amino acids. Single-cell suspensions were lysed with 7mL of red blood cell (RBC) lysing buffer (Life Technologies) and centrifuged at 700 rcf for 5 mins. After washing three times with 2% RPMI-1640 medium, cells were counted and cultured as described below or proceeding to cell surface staining.

The expression of cell-surface markers and cytokine expression on splenocytes and LN cells were characterized by flow cytometry. For analysis of naïve cells, 5x105 RBC depleted splenocytes and LN cells were plated in 96-well V-bottom plates (Starstedt) and blocked with 50μl of 1% mouse IgG in 2%FBS PBS supplemented with azide (PFN3) for 20 mins at 4°C. Cells were then stained with the following primary conjugated antibodies for 30 mins on ice.

All antibodies were re-suspended in PFN3. When required, cells were washed twice with 100μl of PFN3 and stained with secondary SA-APC, SA-APC-Cy7, SA-PeCy7, or SAPercp-Cy5.5 for 30 mins on ice. Cells were then washed twice with PFN3 and resuspended in a PFN3 solution containing propidium iodide (PI) before proceeding to FACS acquisition.

For examination of intracellular cytokine production, 0.5x106 RBC depleted splenocytes and LN cells were plated in 96-well flat bottom plates (BD Biosciences) in 10% FBS in complete RPMI-1640 in the presence of 0.5μg/mL phorbol 12-myrisate 13-acetate (PMA), 0.5μg/mL Ionomycin, and Golgistop (BD Biosciences) for 4 hrs. Cells were subsequently washed in PBS and stained with Near-Infrared Live Dead (Life Technologies) as described in the manufacturer’s protocol. Cells were then washed twice in PFN3 and stained for cell surface markers as described previously. Cells were then 43 fixed with 100μl of Cytofix/Cytoperm solution as described in the manufacturer’s protocol. For intracellular staining, cells were then stained with anti-IL-17A, and antiIFN-γ for 30 mins on ice, washed twice, and resuspended in PFN3 before proceeding to FACS acquisition.

Nonspecific background staining was determined by using fluorochrome-matched isotype antibodies and fluorescence minus one control. Samples were acquired in a BD LSRII or FACS CantoII cytometer (BD Biosciences). For each experiment, at least 100,000 live events were acquired and analyzed using Flowjo software (Tree Star Inc.).

**Statistical analysis:** Statistical analysis was done using GraphPad Prism software (<https://www.graphpad.com/scientific-software/prism/>). Unless otherwise stated, unpaired Student t-test was used to compare significances between two groups. Multifactorial analysis of variance (ANOVA) with post-hoc Bonferroni test was used to compare significances between two or more groups in cases where a single complementary p-value could not be computed. P<0.05 was considered statistically significant.

**Morris Water Maze (MWM):** Mice received visible-platform training for 3 days (4 trials per day) and hidden platform training for 12 days (4 trials per day). If the mice did not find the platform within 90 s, then they were guided to the platform by the experimenter’s hand. For hidden-platform training, the platform was submerged under 1.5 cm of water; the procedure is otherwise the same as that used for visible-platform training. The location of the platform was changed in hidden-platform training compared to visible-platform training. For reversal training, the location of the platform was changed to a quadrant different from that used for regular hidden-platform training. On days 6, 9, 12, and 15, mice were given a 60-s probe trial, where they were allowed to explore the maze without a platform. The intertrial interval was roughly 10–15 min. Learning was assessed by evaluating the time and distance required to find the hidden platform in the training trials, and

memory was measured by examining the time spent during the probe trials in the quadrant of the

pool where the platform was previously located.

**Open Field Test:** Mice were placed into walled apparatus with sensors attached to record their position continuously for 1 hour. Positions and breaks in beam sensors were recorded and analyzed by Amonlite-Activity Monitor Software. Data output was in total activity, fast activity, slow activity, active time, static time, distance travelled in counts of beam breaks per time.

**Marble burying test:** Cages were half filled with wood shaving bedding, and 20 marbles were lined approximately 2cm apart within the cage. Mice were each placed in the cage and left to freely dig around for an hour. At the end of the session, marbles which were covered at least two-third with bedding were counted as buried.

**NeuN cell counts:** Were performed manually for each image using ImageJ cell counter.

**Pericyte coverage immunohistochemistry**: Sections were blocked with 5% normal donkey serum (Vector Laboratories)/0.1%Triton-X/0.01 M PBS for 1 h and incubated with polyclonal goat anti-mouse aminopeptidase N/CD13 for pericyte coverage. After incubation with the primary antibody, sections were washed in PBS and incubated with Alexa fluor 647-conjugated donkey anti-goat. To visualize brain endothelial vascular profiles sections were incubated with Dylight 594-conjugated Lycopersicon esculentum lectin (Vector Labs, DL-1177; 1:200) for 1 h. For double staining of lectin and CD13, Dylight 594-lectin was incubated simultaneously with Alexa fluor 647-conjugated donkey anti-goat secondary antibody for CD13. All incubations were performed in dark to prevent fading of fluorescence. All images were taken with a BZ-9000 fluorescent microscope (Keyence Corp). Z-stack projections, pseudo-coloring and image analysis were performed using ImageJ software (US National Institutes of Health). Gain, digital offset, and laser intensity were kept standardized.

**Pericyte coverage quantification**: Ten-micron maximum projection z-stacks (field area 640 x 480 μm) were reconstructed, and the areas occupied by CD13-positive (pericyte) and lectin-positive (endothelium) fluorescent signals on vessels ≤ 6 μm in diameter were subjected separately to threshold processing and analyzed using ImageJ. First, black and white 8-bit images for CD13 and lectin signals were thresholded separately using Otsu’s thresholding plugin that minimize the intra-class variance of the thresholded black and white pixels, as we previously described [7](#_ENREF_7) . After thresholding, the integrated signal density for each thresholded image was calculated. In order to express the integrated signal density as the area of the image (in pixels) occupied by the fluorescent signal, the integrated signal density was divided by 255 (the maximum pixel intensity for an 8-bit image). The integrated pixel-based area ratios of CD13 and lectin fluorescent signals were used to determine pericyte coverage as a percentage (%) of CD13-positive surface area covering lectin-positive endothelial capillary surface area per field, as previously reported [7](#_ENREF_7),[8](#_ENREF_8). In each animal, 4–6 randomly selected fields in the cortex were analyzed in 4 non-adjacent sections (~100 μm apart), and averaged per mouse.

**Table. 1 Antibodies**

| **Primary Antibody** | **Species** | **Vendor, Catalog** | **RRID** | **Dilution** |
| --- | --- | --- | --- | --- |
| Hfe2 | Goat, polyclonal | R&D, AF3720 | AB_2264104 | 1:200 |
| CD31 | Goat, polyclonal | R&D, AF3628 | AB_2161028 | 1:100 |
| Neogenin | Rabbit, polyclonal | Santa Cruz, H-175 | AB_10609239 | 1:100 |
| Neogenin | Goat, polyclonal | Santa Cruz, C-20 | AB_630839 | 1:100 |
| Isolectin | *Griffonia simplicifolia* | Invitrogen, I21411 | AB_2314662 | 1:200 |
| Fibrinogen | Rabbit, polyclonal | Abcam, ab34269 | AB_732367 | 1:200 |
| RGMa | Goat, polyclonal | Santa Cruz, Y-13 | AB_2010852 | 1:100 |
| RGMa | Goat, polyclonal | R&D, AF2459 | AB_355273 | 1:200 |
| Transferrin | Mouse, monoclonal | Santa Cruz, F-8 | AB_2077957 | 1:1000 |
| CD3 | Hamster, monoclonal | BioLegend, 145-2C11 | AB_312666 | 1:100 |
| B220 | Rat, monoclonal | BioLegend, RA3-6B2 | AB_10933424 | 1:200 |
| CD11b | Rat, monoclonal | BioLegend, M1/70 | AB_312784 | 1:200 |
| CD4 | Rat, monoclonal | BioLegend, GK1.5 | AB_312686 | 1:200 |
| Claudin-5 | Rabbit, polyclonal | Abcam, ab15106 | AB_301652 | 1:300 |
| GAPHD | Mouse, monoclonal | Abcam, ab8245 | AB_2107448 | 1:500 |
| CD13 | Goat, polyclonal | R&D, AF2335 | AB_2227288 | 1:250 |

| **Secondary Antibody** | **Fluorophore** | **Vendor, Catalog** | **RRID** | **Dilution** |
| --- | --- | --- | --- | --- |
| Donkey anti-goat IgG | Alexa Fluor 488 | Invitrogen, A11055 | AB_2534102 | 1:1000 |
| Donkey anti-goat IgG | Alexa Fluor 594 | Invitrogen, A11058 | AB_2534105 | 1:1000 |
| Donkey anti-goat IgG | Alexa fluor 647 | Invitrogen, A-21447 | AB_141844 | 1:500 |
| Donkey anti-rabbit IgG | Alexa Fluor 594 | Invitrogen, A21207 | AB_141637 | 1:1000 |
| Donkey anti-rabbit IgG | Alexa Fluor 488 | Invitrogen, A21206 | AB_2556546 | 1:1000 |
| Goat anti-mouse IgG | IRDye 800 | LI-COR, 925-32210 | AB_2687825 | 1:10,000 |
| Goat anti-rabbit IgG | IRDye 680 | LI-COR, 925-68071 | AB_10956166 | 1:10,000 |
| Donkey anti-rat IgG | Alexa Fluor 488 | Invitrogen, A21208 | AB_2535794 | 1:1000 |
| Donkey anti-rat IgG | Alexa Fluor 594 | Invitrogen, A21209 | AB_2535795 | 1:1000 |

**Table. 2 Flow cytometry antibodies**

| **Antibody** | **Clone** | **Company** |
| --- | --- | --- |
| CD5 | 53-7.3 | BioLegend |
| CD3 | 145-2C11 | BioLegend |
| CD4 | GK1.5 | BioLegend |
| CD8 | 53-6.7 | BioLegend |
| CD19 | 6D5 | BioLegend |
| CD11b | M1/70 | BioLegend |
| CD11c | N418 | BioLegend |
| CD80 | 16-10A1 | BioLegend |
| CD86 | GL-1 | BioLegend |
| CD44 | IM7 | BioLegend |
| MHC II | M5/114.15.12 | BioLegend |
| CD62L | MEL-14 | BioLegend |
| ICAM-1 (CD54) | 3E2 | BioLegend |
| IL-17A | TC11-18H10.41 | BioLegend |
| IFN-γ | XMG1.2 | BioLegend |

**Methods References:**

1 Susaki, E. A. *et al.* Advanced CUBIC protocols for whole-brain and whole-body clearing and imaging. *Nat Protoc* **10**, 1709-1727, doi:10.1038/nprot.2015.085 (2015).

2 Rus, H. *et al.* The voltage-gated potassium channel Kv1.3 is highly expressed on inflammatory infiltrates in multiple sclerosis brain. *Proc Natl Acad Sci U S A* **102**, 11094-11099, doi:10.1073/pnas.0501770102 (2005).

3 Montagne, A. *et al.* Pericyte degeneration causes white matter dysfunction in the mouse central nervous system. *Nat Med* **24**, 326-337, doi:10.1038/nm.4482 (2018).

4 Aricescu, A. R., Lu, W. & Jones, E. Y. A time- and cost-efficient system for high-level protein production in mammalian cells. *Acta Crystallogr D Biol Crystallogr* **62**, 1243-1250, doi:10.1107/S0907444906029799 (2006).

5 DiStefano, M. T. *et al.* The Lipid Droplet Protein Hypoxia-inducible Gene 2 Promotes Hepatic Triglyceride Deposition by Inhibiting Lipolysis. *J Biol Chem* **290**, 15175-15184, doi:10.1074/jbc.M115.650184 (2015).

6 Chen, D., Zhao, M. & Mundy, G. R. Bone morphogenetic proteins. *Growth Factors* **22**, 233-241, doi:10.1080/08977190412331279890 (2004).

7 Nikolakopoulou, A. M., Zhao, Z., Montagne, A. & Zlokovic, B. V. Regional early and progressive loss of brain pericytes but not vascular smooth muscle cells in adult mice with disrupted platelet-derived growth factor receptor-beta signaling. *PLoS One* **12**, e0176225, doi:10.1371/journal.pone.0176225 (2017).

8 Nikolakopoulou, A. M. *et al.* Pericyte loss leads to circulatory failure and pleiotrophin depletion causing neuron loss. *Nat Neurosci* **22**, 1089-1098, doi:10.1038/s41593-019-0434-z (2019).
